# Supplementary material for: Properties of a new 4-imidazolyl derivative of a 14-membered tetraazamacrocyclic chelating agent
Source: Royal Society of Chemistry journal article supplement (doi:10.1039/b710122h), 2007-01-01
Supplement: b710122h.pdf [file b710122h.pdf]

## Electronic Supplementary Information

### Properties of a new 4-imidazolyl derivative of a 14-membered tetraazamacrocyclic chelating agent

Rute M. Nunes,<sup>a</sup> Rita Delgado,<sup>a,b\*</sup> M. Fátima Cabral,<sup>c</sup> Judite Costa,<sup>c</sup> Paula Brandão,<sup>d</sup> Vítor Félix<sup>d</sup> and Brian J. Goodfellow<sup>d</sup>

<sup>a</sup> Instituto de Tecnologia Química e Biológica, UNL, Apartado 127, 2781-901 Oeiras, Portugal; <sup>b</sup> Instituto Superior Técnico, Av. Rovisco Pais, 1049-001 Lisboa, Portugal; <sup>c</sup> Centro de Estudos de Ciências Farmacêuticas, Fac. de Farmácia de Lisboa, Av. Prof. Gama Pinto, 1649-003 Lisboa, Portugal; <sup>d</sup> Departamento Química, CICECO, Universidade de Aveiro, 3810-193 Aveiro, Portugal.

## Content

**Table S1** Stability constants (log units) for the complexes of L<sup>1</sup> and related ligands with selected metal ions.

**Table S2.** Spectroscopic UV-vis-near IR data and magnetic moments ( $\mu$ ) for the Co<sup>2+</sup>, Ni<sup>2+</sup> and Cu<sup>2+</sup> complexes of L<sup>1</sup>

**Table S1.** Stability constants (log units) for the complexes of L<sup>1</sup> and related ligands\* with selected metal ions. *T* = 298.2 K, *I* = 0.10 mol dm<sup>-3</sup> in KNO<sub>3</sub>.

| Equilibrium reaction                                                         | L <sup>1</sup> <sup>a</sup> | L <sup>3</sup> <sup>b</sup> | L <sup>4</sup> <sup>c</sup> | L <sup>8</sup> <sup>d</sup> | L <sup>9</sup> <sup>d</sup> |
|------------------------------------------------------------------------------|-----------------------------|-----------------------------|-----------------------------|-----------------------------|-----------------------------|
| K <sup>+</sup> + L ⇌ [KL] <sup>+</sup>                                       | 1.86(4)                     | –                           | –                           | –                           | –                           |
| Mn <sup>2+</sup> + L ⇌ [MnL] <sup>2+</sup>                                   | 7.95(1)                     | –                           | –                           | –                           | –                           |
| [MnL] <sup>2+</sup> + H <sup>+</sup> ⇌ [M(HL)] <sup>3+</sup>                 | 6.09(4)                     | –                           | –                           | –                           | –                           |
| Fe <sup>2+</sup> + L ⇌ [FeL] <sup>2+</sup>                                   | 9.73(2)                     | –                           | –                           | –                           | –                           |
| [FeL] <sup>2+</sup> + H <sup>+</sup> ⇌ [Fe(HL)] <sup>3+</sup>                | 6.06(4)                     | –                           | –                           | –                           | –                           |
| Co <sup>2+</sup> + L ⇌ [CoL] <sup>2+</sup>                                   | 12.77(5)                    | 14.4                        | 13.5                        | 11.55                       | 11.36                       |
| [CoL] <sup>2+</sup> + H <sup>+</sup> ⇌ [Co(HL)] <sup>3+</sup>                | 5.73(3)                     | 4.1                         | –                           | –                           | 3.99                        |
| [CoHL] <sup>3+</sup> + H <sup>+</sup> ⇌ [Co(H <sub>2</sub> L)] <sup>4+</sup> | 3.88(5)                     | –                           | –                           | –                           | –                           |
| Ni <sup>2+</sup> + L ⇌ [NiL] <sup>2+</sup>                                   | 16.97(2)                    | 16.59                       | 16.94                       | 15.01                       | 14.93                       |
| [NiL] <sup>2+</sup> + H <sup>+</sup> ⇌ [Ni(HL)] <sup>3+</sup>                | 3.79(2)                     | 2.94                        | 2.1                         | 2.59                        | 3.23                        |
| [NiHL] <sup>3+</sup> + H <sup>+</sup> ⇌ [Ni(H <sub>2</sub> L)] <sup>4+</sup> | 2.64(2)                     | –                           | –                           | –                           | –                           |
| Cu <sup>2+</sup> + L ⇌ [CuL] <sup>2+</sup>                                   | 20.70(4)                    | 21.61                       | 20.13                       | 18.46                       | 18.96                       |
| [CuL] <sup>2+</sup> + H <sup>+</sup> ⇌ [Cu(HL)] <sup>3+</sup>                | 4.99(5)                     | 2.28                        | –                           | 2.93                        | 3.62                        |
| [CuL] <sup>2+</sup> ⇌ [ML(OH)] <sup>+</sup> + H <sup>+</sup>                 | -11.09(6)                   | –                           | –                           | –                           | –                           |
| Zn <sup>2+</sup> + L ⇌ [ZnL] <sup>2+</sup>                                   | 14.28(5)                    | 14.01                       | 14.65                       | 11.90                       | 11.83                       |
| [ZnL] <sup>2+</sup> + H <sup>+</sup> ⇌ [Zn(HL)] <sup>3+</sup>                | 5.84(2)                     | 4.05                        | 1.84                        | 3.0                         | 4.52                        |
| [ZnHL] <sup>3+</sup> + H <sup>+</sup> ⇌ [Zn(H <sub>2</sub> L)] <sup>4+</sup> | 3.44(3)                     | –                           | –                           | –                           | –                           |
| [ZnL] <sup>2+</sup> ⇌ [ZnL(OH)] <sup>+</sup> + H <sup>+</sup>                | -10.64(8)                   | -7.66                       | -8.35                       | –                           | –                           |
| Cd <sup>2+</sup> + L ⇌ [CdL] <sup>2+</sup>                                   | 14.67(1)                    | 14.56                       | 14.85                       | –                           | –                           |
| [CdL] <sup>2+</sup> + H <sup>+</sup> ⇌ [Cd(HL)] <sup>3+</sup>                | 4.99(2)                     | 3.84                        | 1.91                        | –                           | –                           |
| [CdHL] <sup>3+</sup> + H <sup>+</sup> ⇌ [Cd(H <sub>2</sub> L)] <sup>4+</sup> | 3.55(5)                     | –                           | –                           | –                           | –                           |
| [CdL] <sup>2+</sup> ⇌ [CdL(OH)] <sup>+</sup> + H <sup>+</sup>                | -10.13(6)                   | –                           | –                           | –                           | –                           |
| Pb <sup>2+</sup> + L ⇌ [PbL] <sup>2+</sup>                                   | 8.93(1)                     | 10.89                       | 10.69                       | –                           | –                           |
| [PbL] <sup>2+</sup> + H <sup>+</sup> ⇌ [Pb(HL)] <sup>3+</sup>                | 6.35(2)                     | 4.96                        | 3.95                        | –                           | –                           |
| [PbL] <sup>2+</sup> ⇌ [PbL(OH)] <sup>+</sup> + H <sup>+</sup>                | -11.04(3)                   | -9.9                        | -10.59                      | –                           | –                           |
| Fe <sup>3+</sup> + L ⇌ [FeL] <sup>3+</sup>                                   | 20.18(4)                    | 20.64                       | 15.87                       | –                           | –                           |
| [FeL] <sup>3+</sup> + H <sup>+</sup> ⇌ [Fe(HL)] <sup>4+</sup>                | 3.44(5)                     | 2.84                        | 3.31                        | –                           | –                           |

\*The structure of ligands can be seen in Scheme 1. <sup>a</sup> Values in parentheses are standard deviations on the last significant figure. <sup>b</sup> *I* = 0.10 mol dm<sup>-3</sup> in NMe<sub>4</sub>NO<sub>3</sub>, ref. 18. <sup>c</sup> *I* = 0.10 mol dm<sup>-3</sup> in NMe<sub>4</sub>NO<sub>3</sub>, ref. 19. <sup>d</sup> *I* = 0.10 mol dm<sup>-3</sup> in KNO<sub>3</sub>, ref. 5.

Ref. 18 - J. Costa, R. Delgado, M. C. Figueira, R. T. Henriques and M. Teixeira, *J. Chem. Soc., Dalton Trans.*, 1997, 65.

Ref. 19 - J. Costa, R. Delgado, M. G. B. Drew and V. Félix, *J. Chem. Soc., Dalton Trans.*, 1999, 4331.

Ref. 5 - J. H. Timmons, W. R. Harris, I. Murase and A. E. Martell, *Inorg. Chem.*, 1978, **17**, 2192.

**Table S2.** Spectroscopic UV-vis-near IR data and magnetic moments ( $\mu$ ) for the  $\text{Co}^{2+}$ ,  $\text{Ni}^{2+}$  and  $\text{Cu}^{2+}$  complexes of  $\text{L}^1$  ( $T = 298.0 \text{ K}$ ).

| Complex<br>(colour)              | pH   | UV-vis-near IR<br>$\lambda_{\text{max}} / \text{nm}$ ( $\epsilon_{\text{molar}} / \text{dm}^3 \text{mol}^{-1} \text{cm}^{-1}$ ) | $\mu$<br>(MB) |
|----------------------------------|------|---------------------------------------------------------------------------------------------------------------------------------|---------------|
| $[\text{CoL}^1]^{2+}$<br>(pink)  | 7.56 | 1067 (4.1), 930 (sh., 4.7), 581 (sh., 52.5), 506 (170.6),<br>260 ( $7.74 \times 10^4$ ).                                        | 4.9           |
| $[\text{NiL}^1]^{2+}$<br>(green) | 7.78 | 1115 (sh, 2.8), 1072 (3.7), 905 (sh., 6.2), 769 (10.8),<br>625 (sh., 16.4), 572 (25.5), 264 ( $2.66 \times 10^4$ ).             | 3.1           |
| $[\text{CuL}^1]^{2+}$<br>(blue)  | 8.01 | 994 (sh, 45.2), 777 (sh, 92.8), 639 (234.6), 266<br>( $4.06 \times 10^4$ ).                                                     | –             |
